# Supplementary material
Source: PubMed Central journal article supplement (PMC3038489)
Supplement: jc.2010-1318_1.pdf [file jc.2010-1318_1.pdf]

1 **LEGEND SUPPLEMENTAL FIGURE.**

2 **FIG. 1- Supplemental data.** ROC curves for the genes exhibiting higher sensitivity and specificity. By  
3 convention, sensitivity (the proportion of true positive results) is shown on the y axis, going from 0 to 1  
4 (0–100%), and specificity (the proportion of false positive results) is shown on the x axis, going from 0 to  
5 1 (0–100%). Genes *KLK1*, *PVALB* and *ALDHL1* had higher sensitivity and specificity, as described in  
6 Table 2.

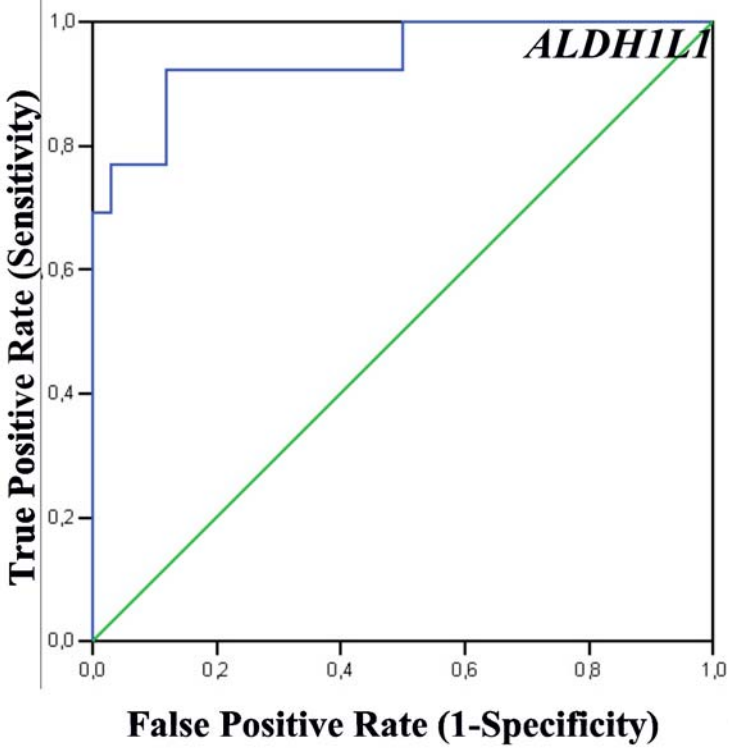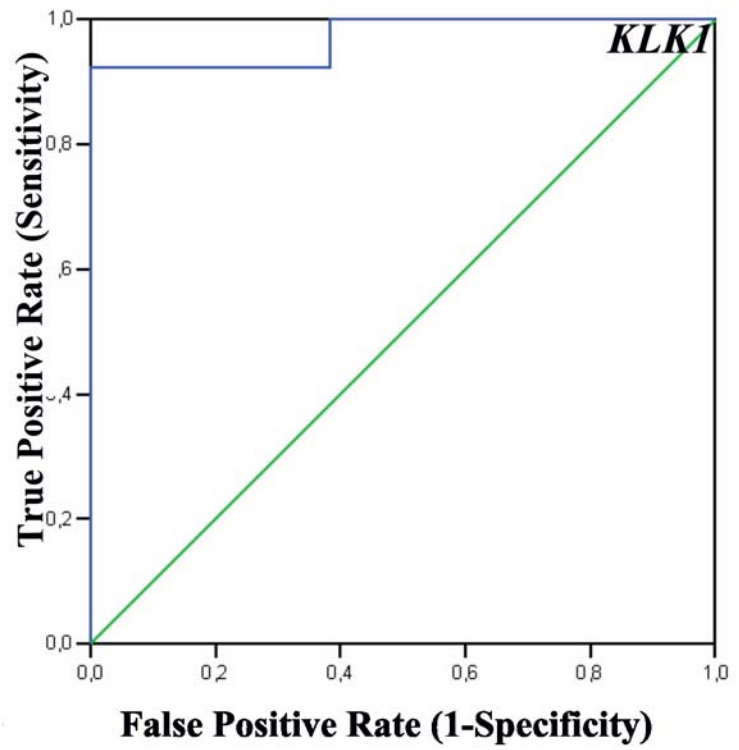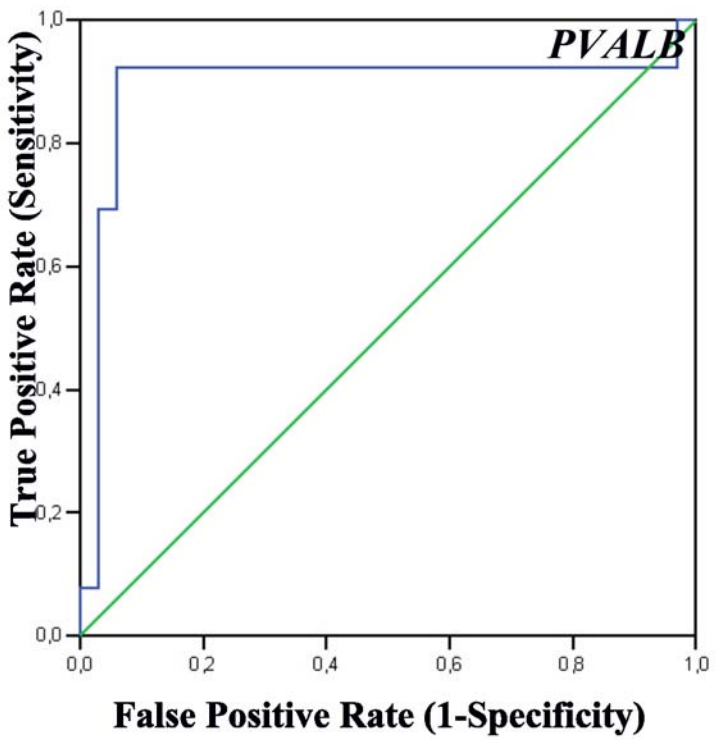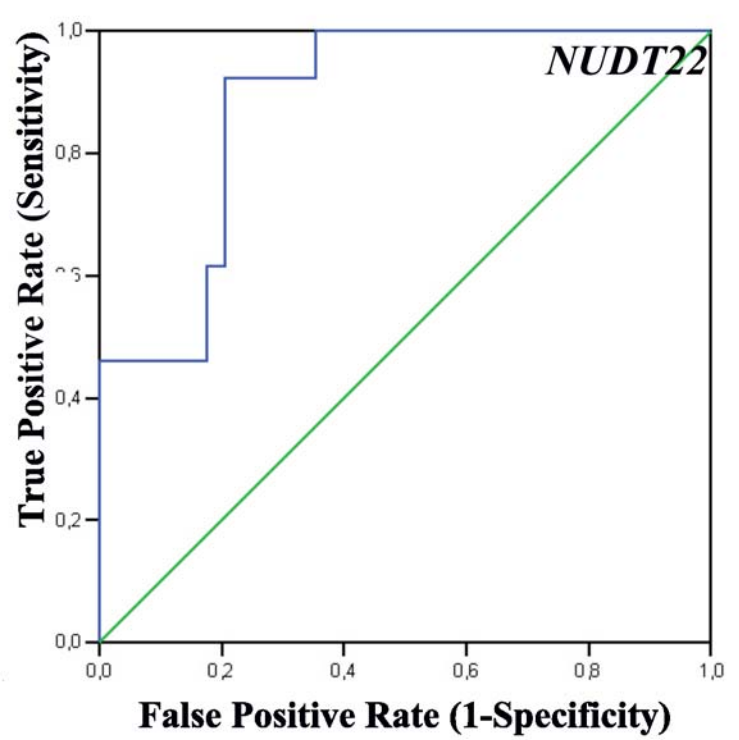

**Table 1 (supplemental data).** Descriptive analysis of log transformed (RE gene) in malignant and HCA

| <b>Gene</b>        | <b>Group</b> | <b>Mean</b>  | <b>Std.<br/>Deviation</b> | <b>Min-max</b>  | <b>Median</b> | <b>P*</b> |
|--------------------|--------------|--------------|---------------------------|-----------------|---------------|-----------|
| 1. <i>ALDH1L1</i>  | Malignant    | 0.37051037   | 0.879370962               | 0.0005-0.8559   | 0.0893        | <0.001    |
|                    | HCA          | 46.74766452  | 57.360577322              | 0.0915-187.5877 | 19.8728       |           |
| 2. <i>TUSC2</i>    | Malignant    | 1.44599763   | 2.988562344               | 0.0027-14-2169  | 0.4295        | 0.003     |
|                    | HCA          | 1.70553562   | 0.949375302               | 0.4195-3.3967   | 1.7966        |           |
| 3. <i>ATF5</i>     | Malignant    | 1.84529303   | 7.170469118               | 0.1351-42.1759  | 0.2632        | <0.001    |
|                    | HCA          | 14.87352667  | 20.625176325              | 0.3412-74.0852  | 9.0468        |           |
| 4. <i>OBSCN</i>    | Malignant    | 32.00369349  | 124.898407528             | 0.0137-701.9978 | 0.4373        | 0.003     |
|                    | HCA          | 6.87543103   | 8.169669248               | 0.2638-22.1657  | 3.1365        |           |
| 5. <i>KLK4</i>     | Malignant    | 1.70744457   | 8.387344174               | 0.0000-49.1027  | 0.0617        | <0.001    |
|                    | HCA          | 62.79872260  | 112.567142580             | 0.0156-376.9591 | 6.4808        |           |
| 6. <i>KLK1</i>     | Malignant    | 0.13090717   | 0.257011296               | 0.0001-1.2381   | 0.0096        | <0.001    |
|                    | HCA          | 158.10513977 | 271.086233395             | 0.0283-959.5691 | 30.7293       |           |
| 7. <i>CHUK</i>     | Malignant    | 0.99558597   | 1.757443629               | 0.0027-9.0252   | 0.2576        | 0.008     |
|                    | HCA          | 1.95722047   | 1.512363097               | 0.0128-4.8876   | 1.5850        |           |
| 8. <i>GFTP1</i>    | Malignant    | 0.89153437   | 1.164060913               | 0.0014-26.3909  | 0.4925        | 0.003     |
|                    | HCA          | 2.13396696   | 1.433657194               | 0.2394-4.2836   | 1.9029        |           |
| 9. <i>DVL3</i>     | Malignant    | 1.73175502   | 4.476256031               | 0.0149-26.3909  | 0.6498        | <0.001    |
|                    | HCA          | 4.06925749   | 3.332169453               | 0.5295-12.3899  | 4.3434        |           |
| 10. <i>PVALB</i>   | Malignant    | 6.57819651   | 35.817827452              | 0.0007-209.0357 | 0.0420        | <0.001    |
|                    | HCA          | 54.17919077  | 84.251602374              | 0.0008-311.6550 | 34.4557       |           |
| 11. <i>SH3BGRL</i> | Malignant    | 1.31941803   | 2.349553817               | 0.0294-9.9788   | 0.3527        | <0.001    |
|                    | HCA          | 4.53989502   | 4.474752201               | 0.3030-15.9028  | 2.8283        |           |

|                    |           |              |               |                  |         |        |
|--------------------|-----------|--------------|---------------|------------------|---------|--------|
| 12. <i>SMARCD3</i> | Malignant | 0.98472291   | 1.247502369   | 0.0067-5.5083    | 0.4448  | 0.001  |
|                    | HCA       | 3.09693702   | 3.000702556   | 0.4048-10.8039   | 2.4006  |        |
| 13. <i>TBC1D1</i>  | Malignant | 0.58220360   | 0.726497484   | 0.0090-2.3654    | 0.2099  | <0.001 |
|                    | HCA       | 6.14380989   | 6.194029382   | 0.2974-21.0959   | 5.7598  |        |
| 14. <i>ATP1A3</i>  | Malignant | 6.58205804   | 19.834864174  | 0.0028-106.0833  | 0.4873  | 0.002  |
|                    | HCA       | 314.67070191 | 660.879803350 | 0.0068-2138.6533 | 20.1683 |        |
| 15. <i>NUDT22</i>  | Malignant | 0.65802017   | 0.807754042   | 0.0020-3.3173    | 0.3163  | <0.001 |
|                    | HCA       | 4.01525516   | 3.777828206   | 0.4618-12.9287   | 1.4063  |        |
| 16. <i>TSPAN3</i>  | Malignant | 1.91795662   | 3.459421884   | 0.001-16.4054    | 0.4057  | <0.001 |
|                    | HCA       | 8.27254695   | 6.841383698   | 0.4386-20.5505   | 6.0797  |        |
| 17. <i>ENAH</i>    | Malignant | 1.01441112   | 1.395766138   | 0.5010-6.6048    | 0.6302  | 0.013  |
|                    | HCA       | 3.37526668   | 3.426557664   | 0.3002-9.3615    | 2.8213  |        |

---

\* Mann-Whitney test, using the RE gene log transformed.

**Table 2 (supplemental data).** Expression of all markers investigated in the panel of paraffin-embedded thyroid samples.

| <b>Samples</b> | <b>Diagnosis</b> | <b>PVALB</b> | <b>KLK1</b> | <b>ITM1</b> | <b>ARG2</b> | <b>C1orf24</b> | <b>DDIT3</b> |
|----------------|------------------|--------------|-------------|-------------|-------------|----------------|--------------|
| 1              | FTA              | -            | -           | -           | -           | -              | -            |
| 2              | FTA              | -            | -           | -           | -           | -              | -            |
| 3              | FTA              | -            | -           | -           | -           | -              | -            |
| 4              | FTA              | -            | -           | -           | -           | -              | -            |
| 5              | FTA              | -            | -           | -           | -           | -              | -            |
| 6              | FTA              | -            | -           | -           | +           | -              | -            |
| 7              | FTA              | -            | -           | -           | -           | -              | -            |
| 8              | FTA              | -            | -           | -           | +           | -              | +            |
| 9              | FTA              | -            | -           | -           | -           | -              | -            |
| 10             | FTA              | -            | -           | -           | -           | -              | -            |
| 11             | FTA              | -            | -           | -           | -           | -              | -            |
| 12             | FTA              | -            | -           | -           | -           | -              | -            |
| 13             | FTA              | -            | -           | +           | +           | -              | +            |
| 14             | FTA              | -            | -           | -           | -           | -              | -            |
| 15             | FTA              | -            | -           | -           | -           | -              | -            |
| 16             | FTA              | -            | -           | +           | -           | -              | -            |
| 17             | HCA              | +            | +           | +           | +           | +              | +            |
| 18             | HCA              | +            | +           | +           | +           | +              | +            |
| 19             | HCA              | +            | +           | +           | +           | +              | +            |
| 20             | HCA              | +            | +           | +           | +           | +              | +            |
| 21             | HCA              | +            | -           | +           | +           | +              | +            |
| 22             | HCA              | +            | -           | +           | +           | +              | +            |
| 23             | HCA              | +            | +           | +           | +           | +              | +            |
| 24             | HCA              | +            | +           | +           | +           | +              | +            |
| 25             | HCA              | +            | +           | +           | +           | +              | +            |
| 26             | HCA              | +            | +           | +           | +           | +              | +            |
| 27             | HCA              | +            | +           | +           | +           | +              | +            |
| 28             | HCA              | +            | +           | +           | +           | +              | +            |
| 29             | HCA              | +            | +           | +           | +           | +              | +            |
| 30             | HCA              | +            | +           | +           | +           | +              | +            |
| 31             | HCA              | +            | +           | +           | +           | +              | +            |
| 32             | HCA              | +            | +           | +           | +           | +              | +            |

|    |       |   |   |   |   |   |   |
|----|-------|---|---|---|---|---|---|
| 33 | HCA   | + | + | + | + | + | + |
| 34 | HCA   | + | + | + | + | + | + |
| 35 | HCA   | + | + | + | + | + | + |
| 36 | HCA   | + | + | + | + | + | + |
| 37 | HCA*  | - | + | + | + | + | + |
| 38 | HCA   | + | + | + | + | + | + |
| 39 | HCA   | + | + | + | + | + | + |
| 40 | FTC   | - | - | + | + | + | + |
| 41 | FTC   | - | - | + | + | + | + |
| 42 | FTC   | - | + | + | + | + | + |
| 43 | FTC   | - | - | + | + | + | + |
| 44 | FTC   | - | - | + | + | + | + |
| 45 | FTC   | - | - | + | + | + | + |
| 46 | FTC   | - | - | + | + | + | + |
| 47 | FTC   | - | - | + | + | + | + |
| 48 | FTC   | - | - | + | + | + | + |
| 49 | FTC   | - | - | + | + | + | + |
| 50 | FTC   | - | - | + | + | + | + |
| 51 | FTC   | - | - | + | + | + | + |
| 52 | FTC   | - | - | + | + | + | + |
| 53 | FTC   | - | + | + | + | + | + |
| 54 | FTC   | - | - | + | + | + | + |
| 55 | HCC   | - | - | + | + | + | + |
| 56 | HCC   | - | + | + | + | + | + |
| 57 | HCC   | - | - | + | + | + | + |
| 58 | HCC   | - | + | + | + | + | + |
| 59 | HCC   | - | + | + | + | + | + |
| 60 | HCC   | - | + | + | + | + | + |
| 61 | HCC   | - | + | + | + | + | + |
| 62 | HCC   | - | - | + | + | + | + |
| 63 | HCC   | - | + | + | + | + | + |
| 64 | HCC   | - | + | + | + | + | + |
| 65 | HCC   | - | + | + | + | + | + |
| 66 | HCC** | + | + | + | + | + | + |
| 67 | HCC   | - | + | + | + | + | + |
| 68 | HCC   | - | + | + | + | + | + |

|    |       |   |   |   |   |   |   |
|----|-------|---|---|---|---|---|---|
| 69 | HCC   | - | - | + | + | + | + |
| 70 | HCC   | - | + | + | + | + | + |
| 71 | HCC   | - | - | + | + | + | - |
| 72 | HCC** | + | + | + | + | + | + |
| 73 | FVPTC | - | - | + | + | + | + |
| 74 | FVPTC | - | + | + | + | + | + |
| 75 | FVPTC | - | - | + | + | + | + |
| 76 | FVPTC | - | - | + | + | + | + |
| 77 | FVPTC | - | - | + | + | + | + |
| 78 | FVPTC | - | - | + | + | + | + |
| 79 | FVPTC | - | - | + | + | + | + |
| 80 | FVPTC | - | - | + | + | + | + |
| 81 | FVPTC | - | - | + | + | + | + |
| 82 | FVPTC | - | - | + | + | + | + |

---

\* PVALB was positive in 22/23 HCAs. Sample # 27 was negative for PVALB.

\*\* PVALB was positive in 2/43 malignant tumors. Samples # 66 and 72
